# Supplementary material for: Body Composition, Anemia, and Kidney Function among Guatemalan Sugarcane Workers
Source: Nutrients. 2021 Nov 2;13(11):3928. doi: 10.3390/nu13113928 (PMC8621317; doi:10.3390/nu13113928)
Supplement: Supplementary file 1 [file nutrients-13-03928-s001.zip › nutrients-1395541-SI.pdf]

| 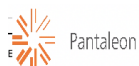 <b>Example weekly menu: Pantaleon</b> |                          |                 |                         |                            |                      |                    |
|-------------------------------------------------------------------------------------------------------------------------|--------------------------|-----------------|-------------------------|----------------------------|----------------------|--------------------|
| Monday                                                                                                                  | Tuesday                  | Wednesday       | Thursday                | Friday                     | Saturday             | Sunday             |
| <b>Breakfast</b>                                                                                                        |                          |                 |                         |                            |                      |                    |
| Scrambled eggs                                                                                                          | Boiled plantain and eggs | Eggs with ejote | Refried beans with eggs | Scrambled eggs             | Eggs with ejote      | Fried eggs         |
| Tomato and onion                                                                                                        | Black beans              | Salsa           | Pepper sauce            | Sausage                    | Black beans          | Tomato and onion   |
| Refried beans                                                                                                           | Cream                    | Black beans     | Rice                    | Black beans                | Cream                | Black beans        |
|                                                                                                                         | Corn Tortillas           | Cheese          | Cream                   | Cheese                     | Corn Tortillas       | Cream              |
| Corn tortillas                                                                                                          | Smoothie                 | Corn tortillas  | Corn tortillas          | Corn tortillas             | Coffee               | Corn tortillas     |
| Coffee                                                                                                                  |                          | Coffee          | Smoothie                | Coffee                     |                      | Smoothie           |
| <b>Lunch</b>                                                                                                            |                          |                 |                         |                            |                      |                    |
| Sausage                                                                                                                 | Hard boiled eggs         | Beef strips     | Spaghetti with sausage  | Eggs with rice             | Sausage              | Roasted chicken    |
| Rice                                                                                                                    | Black beans              | Rice            | Black beans             | Black beans                | Black beans          | Black beans        |
| Black beans                                                                                                             | Tomato salsa             | Black beans     |                         |                            |                      |                    |
| Corn tortillas                                                                                                          | Corn tortillas           | Corn tortillas  | Corn tortillas          | Corn tortillas             | Corn tortillas       | Corn tortillas     |
| Fruit                                                                                                                   | Fruit                    | Fruit           | Fruit                   | Fruit                      | Fruit                | Fruit              |
| Juice beverage                                                                                                          | Juice beverage           | Juice beverage  | Juice beverage          | Juice beverage             | Juice beverage       | Juice beverage     |
| <b>Dinner</b>                                                                                                           |                          |                 |                         |                            |                      |                    |
| Sauteed pork                                                                                                            | Roasted chicken          | White beans     | Chicken soup            | Grilled chicken with salsa | Chicken with noodles | Beef soup          |
| Black beans                                                                                                             | Macaroni salad           | Sauteed pork    | Rice                    | Black beans                | Black beans          | Squash and carrots |
| Rice                                                                                                                    | Black beans              | Rice            |                         | Rice                       |                      | Rice               |
| Corn tortillas                                                                                                          | Corn tortillas           | Corn tortillas  | Corn tortillas          | Corn tortillas             | Corn tortillas       | Corn tortillas     |
| Coffee                                                                                                                  | Juice beverage           | Juice beverage  | Juice beverage          | Smoothie                   | Juice beverage       | Juice beverage     |
| Hot salsa                                                                                                               | Hot salsa                | Hot salsa       | Hot salsa               | Hot salsa                  | Hot salsa            | Hot salsa          |

**Figure S1. Sample weekly menu from Pantaleon for Altiplano workers.**

**Table S1. Pilot analysis of energy intake and macronutrient values among 49 sugarcane cutters in Guatemala, January 2019.**

On a sample of 49 workers, 24 Altiplano and 25 Zona, dietary recall indicated a 24-hr energy intake for Zona workers of was 3836 kcal v. 4185 kcal for Altiplano workers. While mean kcal intake values were not statistically significantly different between the groups ( $p=0.12$ ), it is notable that, on average, in this subset of workers, Zona workers consumed approximately 350 kcal per day less than did Altiplano workers. Protein intake values differed between groups. Compared to Altiplano workers, Zona workers consumed less protein, both for relative percent of energy derived from protein and for total protein intake in grams per day. In terms of energy derived from protein, Zona workers were found to consume 14% of kcal, compared to 15% among Altiplano workers ( $p=0.02$ ). Total daily protein intake was lower in Zona versus Altiplano workers by a mean difference of 22 grams per day (158 v. 136 grams per day, respectively,  $p=0.02$ ).

| Macronutrient            | Cohort (n=49)  | Altiplano (n=24) | Zona (n=25)    | p-value     |
|--------------------------|----------------|------------------|----------------|-------------|
| <b>Mean (SD)</b>         |                |                  |                |             |
| Energy intake (kcal)     | 4007.0 (781.6) | 4184.8 (619.7)   | 3836.4 (889.8) | 0.12        |
| Carbohydrate (% of kcal) | 66.0 (4.5)     | 66.5 (3.9)       | 65.5 (5.0)     | 0.45        |
| Fat (% of kcal)          | 18.5 (4.0)     | 17.9 (3.7)       | 19.1 (4.2)     | 0.27        |
| Protein (% of kcal)      | 14.6 (1.7)     | 15.2 (1.0)       | 14.1 (2.0)     | <b>0.02</b> |
| Protein (g)              | 147.1 (33.2)   | 158.3 (21.8)     | 136.4 (38.8)   | <b>0.02</b> |
| Protein avb (g)          | 32.8 (11.7)    | 36.0 (8.7)       | 28.4 (14.1)    | 0.07        |
